# Supplementary material
Source: PubMed Central journal article supplement (PMC9005578)
Supplement: NIHMS1748302-supplement-3.pdf [file NIHMS1748302-supplement-3.pdf]

1 AATS 2021 Annual Meeting

2  
3 Extracellular Vesicle Therapy Improves Diastolic Performance and Reduces  
4 Perivascular Fibrosis in a High Fat Fed Porcine Model of Chronic Myocardial  
5 Ischemia

6  
7 Presenter: Dr. Ahmed Mohamed Aboulgheit

8  
9 Invited Discussant: Dr. Pavan Atluri

10  
11  
12  
13 Dr. Philippe Menasché (Paris, France):

14  
15 First of all, congratulations. I think it's a very important and interesting study, particularly  
16 because it's done in a large animal model. I have two questions for you. Number one, in one  
17 of your slides, it was indicated that you inject 50 micrograms of EVs. As you know, the  
18 international society rather recommends other metrics—for example the number of vesicles  
19 or the protein-to-vesicle number ratio.

20  
21 My first question is, at least do you have an exact number of vesicles which were injected?  
22 And my second question is, because this study has to do with fibrosis, do you have some  
23 histological data regarding the infiltration of the myocardium by inflammatory cells—in  
24 particular macrophages, and of the phenotypic pattern of these macrophages?

25  
26  
27 Dr. Ahmed Mohamed Aboulgheit (Providence, RI):

28  
29 Those are excellent questions. To address the first question, it's been our practice here to  
30 purify these extracellular vesicles, and we obtain a weight. Obviously the 50 micrograms of  
31 purified extracellular vesicles as our technique. Previously, we've shown results with this in  
32 terms of angiogenic properties and increased new vessel formation in the myocardium. But it  
33 is very interesting to quantify it in terms of a numerical or a count of vesicles, or ratio to  
34 protein as you said. So, this is something that we'll potentially be considering in the future.

35  
36 Now, the second question is—we were initially interested in, as you mentioned,  
37 macrophages. But we went on to actually quantify myofibroblasts and the ratio of ASMA to  
38 vimentin, which we report in our paper that we've submitted recently to JTCVS. As a more  
39 sensitive sort of marker of myocardial infiltration with fibrogenic cells. And we report that  
40 this in fact was reduced with EV treatment.

41  
42  
43 Dr. Pavan Atluri (Philadelphia, PA):

44  
45 Dr. Aboulgheit, I commend you, your mentors, and colleagues on yet another very nicely  
46 conducted hypothesis-driven translational research project. I thank you for sending me your  
47 paper early and enjoyed reading it. The body of work that your group has produced pertaining  
48 to the impact of MSC EV therapy in relation to comorbidities, namely hypercholesterolemia  
49 in diabetes, of course has been very impactful. In this study you have evaluated a very little  
50 thought-of yet very important aspect of cardiovascular disease, notably diastolic dysfunction.

51 The findings are interesting and thought-provoking. I do have a few questions to maximize  
52 our understanding of the therapeutic benefit that you present.

53

54 Why did you choose human MSCs rather than porcine? Do you have any concerns for  
55 immunologic tolerance? There has been quite a bit of dichotomy with our group amongst  
56 others demonstrating immunologic tolerance, yet others raising concerns about the potential  
57 for this tolerance. So why did you use human cells instead of porcine cells?

58

59

60 Dr. Aboulgheit:

61

62 For that very purpose of tolerance. That immunological reaction that may occur—we wanted  
63 to reproduce what would happen in the human model as closely as possible without any  
64 scrutiny in terms of using porcine cells. And with respect to tolerance, I personally don't  
65 know of any issues that have happened with tolerance among species but that would be  
66 interesting to look at.

67

68

69 Dr. Atluri:

70

71 I think it largely depends on what receptors we think are on the EVs that you isolate. Food for  
72 thought.

73

74 Do you have any control data on myocyte size for normal myocardium for age and size,  
75 matched sham hearts from your own samples? We traditionally have thought throughout this  
76 field, especially when we look for improvements in systolic function, the myocyte size is  
77 beneficial in terms of maintaining systolic function. So, it would be important to understand  
78 the baseline depreciate of preservation to normal. Do you have a comparator?

79

80

81 Dr. Aboulgheit:

82

83 We do have a sham model with the high-fat diet alone. And this in fact was reported in  
84 previous studies that the high-fat diet alone actually produces an increase or a higher  
85 performance in systolic function. We attributed this to many things like metabolic stress-  
86 induced pathways that promotes cellular proliferation as a result of metabolic stress. But yes,  
87 it'd be very interesting to compare that data with what we have at hand.

88

89

90 Dr. Atluri:

91

92 Your pressure volume data is very encouraging in terms of diastolic relaxation. Have you  
93 seen other measures utilizing your pressure volume analytics in terms of looking at improved  
94 cardiac flow? i.e. with improved diastolic relaxation —have you seen an improvement in  
95 cardiac output, stroke volume, or even end-systolic pressure-volume relationships?

96

97

98

99

100

101 Dr. Aboulgheit:

102

103 Yes, sir, we have. And we reported this in our previous paper, which was recently published  
104 in JAHA. We saw an increase in end-systolic pressure-volume relationship. We saw  
105 increased cardiac output. And we saw measures of increased non-volume-dependent  
106 measures of systolic performance with EV treatment.

107

108

109 Dr. Atluri:

110

111 Great. Congratulations on the nice body of work.

112

Journal Pre-proof
